# Supplementary material for: Durable cross-protective neutralizing antibody responses elicited by lipid nanoparticle-formulated SARS-CoV-2 mRNA vaccines
Source: Springer Nature journal article supplement (doi:10.1038/s41541-024-00835-x), 2024-02-23
Supplement: MOESM1 [file 41541_2024_835_MOESM1_ESM.pdf]

## Supplementary information for

# **Durable cross-protective neutralizing antibody responses elicited by lipid nanoparticle-formulated SARS-CoV-2 mRNA vaccines**

Ki Hyun Bae<sup>1,†</sup>, Bhuvaneshwari Shunmuganathan<sup>2,3,†</sup>, Li Zhang<sup>1,†</sup>, Andrew Lim<sup>4</sup>, Rashi Gupta<sup>2,3</sup>, Yanming Wang<sup>1</sup>, Boon Lin Chua<sup>1</sup>, Yang Wang<sup>5</sup>, Yue Gu<sup>2,3</sup>, Xinlei Qian<sup>3</sup>, Tan Siang Ling Isabelle<sup>3</sup>, Kiren Purushotorman<sup>2,3</sup>, Paul A MacAry<sup>2,3,\*</sup>, Kevin P White<sup>5,6,\*</sup>, Yi Yan Yang<sup>1,\*</sup>

<sup>1</sup>Bioprocessing Technology Institute (BTI), Agency for Science, Technology and Research (A\*STAR), 20 Biopolis Way, Centros #06-01, Singapore 138668, Republic of Singapore

<sup>2</sup>Department of Microbiology and Immunology, Yong Loo Lin School of Medicine, National University of Singapore, Singapore 117545, Republic of Singapore

<sup>3</sup>NUS-Cambridge Immune Phenotyping Centre (NCIPC), Life Sciences Institute, National University of Singapore, Singapore 117456, Republic of Singapore

<sup>4</sup>Proxus, Inc.

<sup>5</sup>Genome Institute of Singapore (GIS), Agency for Science, Technology and Research (A\*STAR), 60 Biopolis St, Singapore 138672, Republic of Singapore

<sup>6</sup>Department of Biochemistry and Precision Medicine Translational Research Program, Yong Loo Lin School of Medicine, National University of Singapore, Singapore 119228, Republic of Singapore

<sup>†</sup> These authors contributed to this study equally.

\*Co-corresponding authors: mdckpw@nus.edu.sg (K.P. White); micpam@nus.edu.sg (P.A. MacAry); yyyang@bti.a-star.edu.sg (Y.Y. Yang)

**Supplementary Table 1.**

Polydispersity index and encapsulation efficiency of 4 different COVID-19 vaccine mRNA-LNPs.

| Formulation       | Polydispersity index (PDI) | Encapsulation efficiency (%) |
|-------------------|----------------------------|------------------------------|
| PVX1010 mRNA-LNPs | $0.127 \pm 0.060$          | 94.3                         |
| PVX1020 mRNA-LNPs | $0.030 \pm 0.003$          | 93.5                         |
| PVX1040 mRNA-LNPs | $0.077 \pm 0.024$          | 90.9                         |
| PVX1050 mRNA-LNPs | $0.082 \pm 0.008$          | 93.7                         |

**Supplementary Table 2.**

Sequence of the primers used to generate constructs for RBD variants.

| Primer   | Sequence                       |
|----------|--------------------------------|
| D21 R    | CAAAAGGGCACAAGTTTGTAATATTAGGAA |
| I14 F    | ATTACAAACTTGTGCCCTTTTGATGAAG   |
| G230 F   | GCACAGGTGTTCTTACTGAGTCTAAC     |
| E236 R   | CTCAGTAAGAACACCTGTGCCTTTTAA    |
| E236 T R | CTCAGTAAGAACACCTGTGCCTGTAA     |

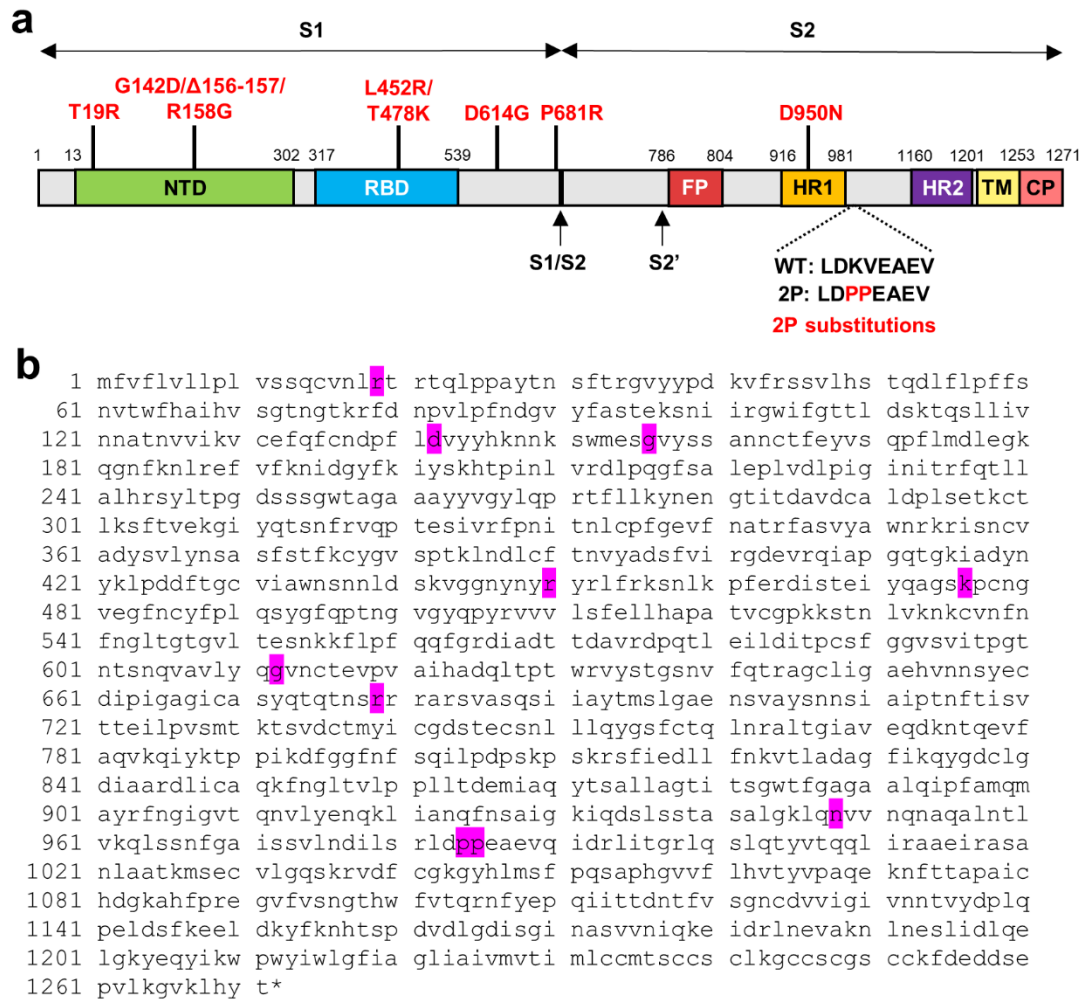

**Supplementary Figure 1.** Design of mRNA vaccine encoding the full-length spike glycoprotein of the Delta variant of SARS-CoV-2. **a** Linear diagram of the spike glycoprotein encoded by PVX1010 mRNA. N-terminal domain (NTD), receptor binding domain (RBD), S1/S2 cleavage site (S1/S2), S2 cleavage site (S2'), fusion peptide (FP), heptad repeat 1 (HR1), heptad repeat 2 (HR2), transmembrane domain (TM) and cytoplasmic tail domain (CP). Amino acid mutations, deletions and substitutions are shown in red text. **b** Protein sequence of the spike glycoprotein encoded by PVX1010 mRNA. Amino acid changes are highlighted in pink.

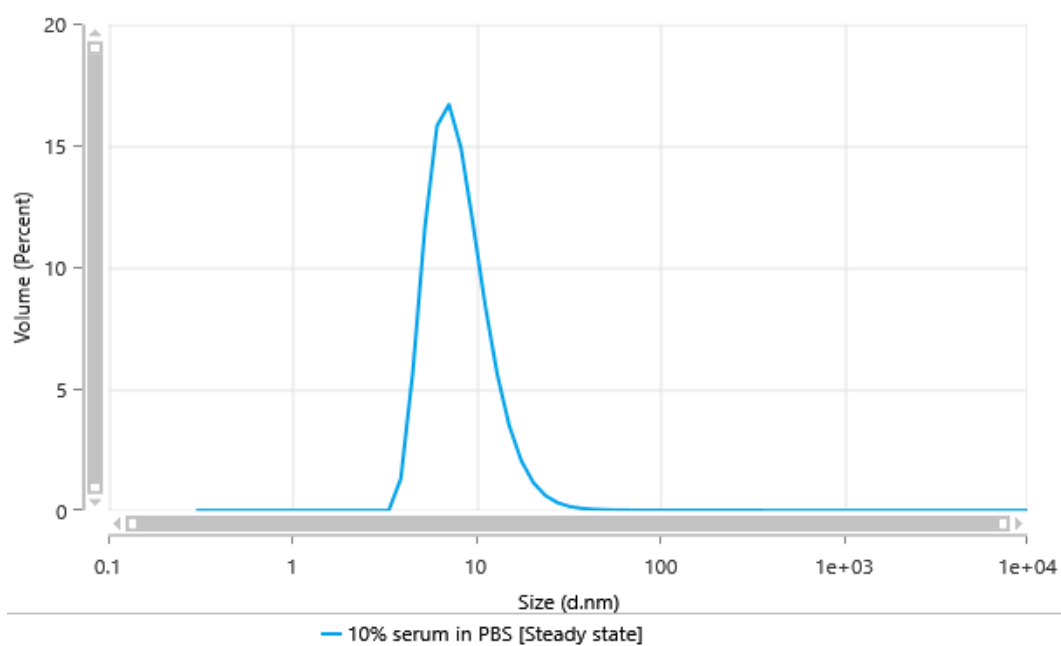

**Supplementary Figure 2.** Size distribution profile of 10% serum-supplemented PBS.

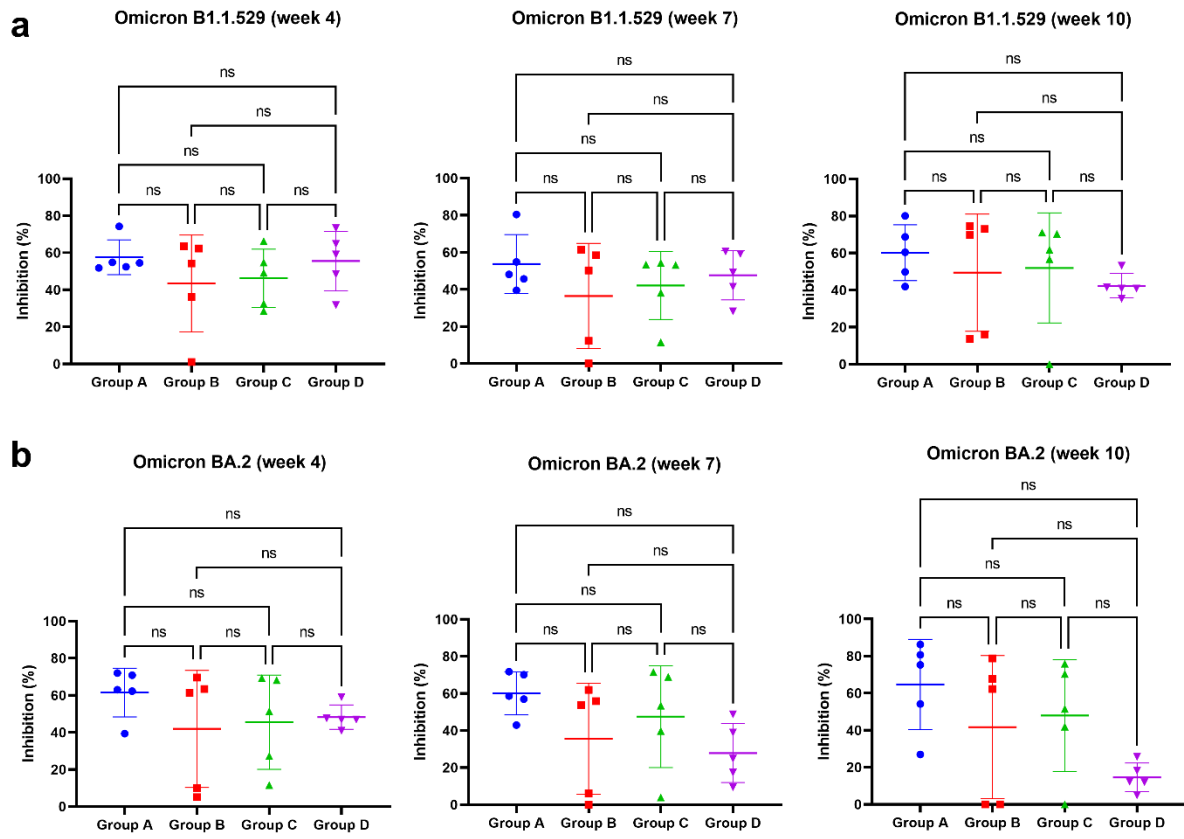

**Supplementary Figure 3.** ACE2-RBD binding inhibitory response observed for (a) Omicron B1.1.529 and (b) BA.2 variants at week 4, 7 and 10. The tested vaccination groups include Group A (a three-dose immunization of PVX1010 mRNA-LNPs), Group B (two doses of PVX1010 plus PVX1040 booster), Group C (two doses of PVX1010 plus PVX1050 booster) and Group D (two doses of PVX1010 plus PVX1020 booster). Mean  $\pm$  SD ( $n = 5$ ); ns: nonsignificant ( $P > 0.05$  from one-way ANOVA with Tukey's post hoc test).

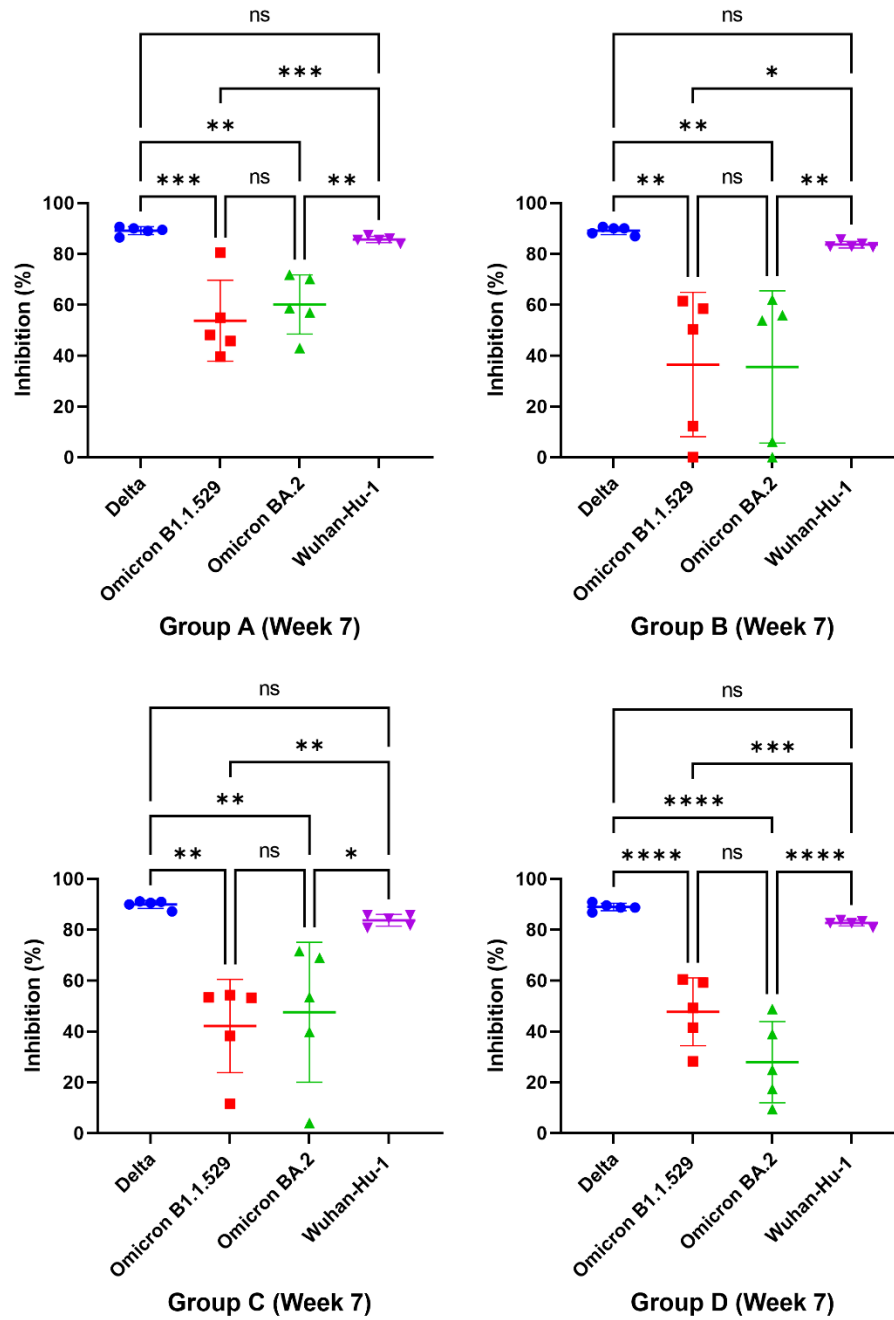

**Supplementary Figure 4.** ACE2-RBD binding inhibitory responses observed at week 7. The tested vaccination groups include Group A (a three-dose immunization of PVX1010 mRNA-LNPs), Group B (two doses of PVX1010 plus PVX1040 booster), Group C (two doses of PVX1010 plus PVX1050 booster) and Group D (two doses of PVX1010 plus PVX1020 booster). Mean  $\pm$  SD ( $n = 5$ ); \* $P < 0.05$ ; \*\* $P < 0.01$ ; \*\*\* $P < 0.001$ ; \*\*\*\* $P < 0.0001$ ; ns: nonsignificant ( $P > 0.05$  from one-way ANOVA with Tukey's post hoc test).
